# Supplementary material
Source: PubMed Central journal article supplement (PMC5513817)
Supplement: supp_WNL.0000000000004115_Table_e-1.pdf [file supp_WNL.0000000000004115_Table_e-1.pdf]

**Table e-1.** Schedule of procedures for diagnosis and research outcomes

|                                   |                                                                            | Baseline | 6 mo | 12 mo | 18 mo | 24 mo | 30 mo | 36 mo |
|-----------------------------------|----------------------------------------------------------------------------|----------|------|-------|-------|-------|-------|-------|
| <b>Diagnostic Tests</b>           | History                                                                    | X        | X    |       | X     |       | X     |       |
|                                   | Family History                                                             | X        |      |       |       |       |       |       |
|                                   | Caregiver interview                                                        | X        | X    |       | X     |       | X     |       |
|                                   | Neurological Exam                                                          | X        | X    |       | X     |       | X     |       |
|                                   | EMG                                                                        | X        | X*   |       | X*    |       | X*    |       |
|                                   | MiniMental State Exam <sup>1</sup>                                         | X        | X    |       | X     |       | X     |       |
|                                   | Frontal Assessment Battery <sup>2</sup>                                    | X        | X    |       | X     |       | X     |       |
|                                   | Mattis Dementia Rating Scale -2 <sup>3, 4</sup>                            | X        | X    |       | X     |       | X     |       |
|                                   |                                                                            |          |      |       |       |       |       |       |
|                                   | <b>Research Outcome Measures</b>                                           |          |      |       |       |       |       |       |
| <b>Motor</b>                      | <b>ALSFRS-R<sup>5</sup></b>                                                | X        | X    | X     | X     | X     | X     | X     |
|                                   | Timed gait, timed reading, finger and foot tapping, 9-hole peg test        | X        | X    |       | X     |       | X     |       |
|                                   | Physiology: TMS, EIM                                                       | X        | X    |       | X     |       | X     |       |
|                                   |                                                                            |          |      |       |       |       |       |       |
| <b>Cognitive</b>                  | <b>Letter Fluency Score</b>                                                | X        | X    | X     | X     | X     | X     | X     |
|                                   | DRS, FAB, MMSE, D-KEFS Trails, Sorting, Fluency, 20 Questions <sup>6</sup> | X        | X    |       | X     |       | X     |       |
|                                   | Language: ADRC FTLD module <sup>7</sup>                                    | X        | X    |       | X     |       | X     |       |
|                                   |                                                                            |          |      |       |       |       |       |       |
| <b>Behavioral</b>                 | <b>Frontal Behavioral Inventory<sup>8</sup></b>                            | X        | X    | X     | X     | X     | X     | X     |
| <b>Mood, Pseudo-bulbar affect</b> | ALS depression Inventory, <sup>9</sup> CNS lability <sup>10</sup>          | X        | X    |       | X     |       | X     |       |
| <b>Quality of Life</b>            | SF-8 Health Survey <sup>11</sup>                                           | X        | X    |       | X     |       | X     |       |
| <b>Imaging</b>                    | MRI                                                                        |          |      |       |       |       |       |       |
| <b>Biospecimens</b>               | CSF, blood                                                                 | X        | X    |       | X     |       | X     |       |
|                                   | Skin biopsy                                                                | X        | X**  |       |       |       |       |       |

\*EMG repeated when EI Escorial certainty less than definite

\*\* Skin Biopsy performed only once, usually first, occasionally second visit

## References

1. Folstein MF, Folstein SE, McHugh PR. "Mini-mental state". A practical method for grading the cognitive state of patients for the clinician. J Psychiatr Res 1975;12:189-198.

2. Dubois B, Slachevsky A, Litvan I, Pillon B. The FAB: a Frontal Assessment Battery at bedside. *Neurology* 2000;55:1621-1626.
3. Jurica SJ, Leitten CL, Mattis S. *Dementia Rating Scale: Professional manual*. Odessa: Psychological Assessment Resources, 2001.
4. Rascofsky K, Salmon DP, Hansen LA, Galasko D. Distinct cognitive profiles and rates of decline on the Mattis Dementia Rating Scale in autopsy-confirmed frontotemporal dementia and Alzheimer's disease. *J Int Neuropsychol Soc* 2008;14:373-383.
5. Cedarbaum JM, Stambler N, Malta E, et al. The ALSFRS-R: a revised ALS functional rating scale that incorporates assessments of respiratory function. BDNF ALS Study Group (Phase III). *J Neurol Sci* 1999;169:13-21.
6. Delis DC, Kramer JH, Kaplan E, Holdnack J. Reliability and validity of the Delis-Kaplan Executive Function System: an update. *J Int Neuropsychol Soc* 2004;10:301-303.
7. ADRC FTLD module. Available at: [https://www.alz.washington.edu/WEB/forms\\_ftld.html](https://www.alz.washington.edu/WEB/forms_ftld.html).
8. Milan G, Lamenza F, Iavarone A, et al. Frontal Behavioural Inventory in the differential diagnosis of dementia. *Acta Neurol Scand* 2008;117:260-265.
9. Hammer EM, Hacker S, Hautzinger M, Meyer TD, Kubler A. Validity of the ALS-Depression-Inventory (ADI-12)--a new screening instrument for depressive disorders in patients with amyotrophic lateral sclerosis. *Journal of affective disorders* 2008;109:213-219.
10. Moore SR, Gresham LS, Bromberg MB, Kasarkis EJ, Smith RA. A self report measure of affective lability. *J Neurol Neurosurg Psychiatry* 1997;63:89-93.
11. SF-8 Health Survey. Available at <https://campaign.optum.com/optum-outcomes/what-we-do/health-surveys.html>
