# Supplementary material
Source: PubMed Central journal article supplement (PMC5513817)
Supplement: supp_WNL.0000000000004115_Table_e-2.pdf [file supp_WNL.0000000000004115_Table_e-2.pdf]

Table e-2. Changes from baseline to 6-months: Pearson’s correlation between primary outcome and other clinical measures

|                                                        | ALSFERS-R             | Letter Fluency<br>(total correct words) | FBI (% Possible)      |
|--------------------------------------------------------|-----------------------|-----------------------------------------|-----------------------|
| Letter Fluency (total correct words)                   | .132<br>(23)          | 1<br>(23)                               | -.193<br>(23)         |
| FBI (% Possible)                                       | <b>-.463*</b><br>(24) | -.193<br>(23)                           | 1<br>(24)             |
| ALSFERS-R                                              | <b>1</b><br>(24)      | .132<br>(23)                            | <b>-.463*</b><br>(24) |
| Dementia Rating Scale<br>(age, education scaled score) | .321<br>(24)          | <b>.683**</b><br>(23)                   | -.168<br>(24)         |
| Frontal Assessment Battery<br>(% possible)             | <b>.561**</b><br>(24) | .319<br>(23)                            | <b>-.415*</b><br>(24) |
| 9-Hole Peg test                                        | <b>-.469*</b><br>(22) | -.125<br>21                             | <b>.487*</b><br>(22)  |
| Syllable repetition rate                               | .147<br>(22)          | .019<br>(22)                            | -.155<br>(22)         |

\*\*p< 0.01 level; \* p<0.05.

Parentheses indicate number of participants with measures at both timepoints
